# Supplementary material for: Studies on the syntheses of β-carboline alkaloids brevicarine and brevicolline
Source: publisher site journal article supplement (doi:10.3762/bjoc.21.79), 2025-05-20

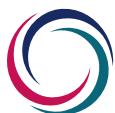

## Supporting Information

for

### Studies on the syntheses of $\beta$ -carboline alkaloids brevicarine and brevicolline

Benedek Batizi, Patrik Pollák, András Dancsó, Péter Keglevich, Gyula Simig, Balázs Volk and Mátyás Milen

*Beilstein J. Org. Chem.* **2025**, 21, 955–963. doi:10.3762/bjoc.21.79

### Checkcif file for compound 31

## checkCIF/PLATON report

You have not supplied any structure factors. As a result the full set of tests cannot be run.

THIS REPORT IS FOR GUIDANCE ONLY. IF USED AS PART OF A REVIEW PROCEDURE FOR PUBLICATION, IT SHOULD NOT REPLACE THE EXPERTISE OF AN EXPERIENCED CRYSTALLOGRAPHIC REFEREE.

No syntax errors found.      CIF dictionary      Interpreting this report

### Datablock: \_142469\_3

---

Bond precision:      C-C = 0.0049 Å      Wavelength=1.54187

Cell:                      a=10.1173 (7)      b=20.5753 (15)      c=30.337 (2)  
                                alpha=90      beta=90      gamma=90

Temperature:      293 K

|                        | Calculated   | Reported   |
|------------------------|--------------|------------|
| Volume                 | 6315.2 (8)   | 6315.2 (8) |
| Space group            | P b c a      | P b c a    |
| Hall group             | -P 2ac 2ab   | -P 2ac 2ab |
| Moiety formula         | C17 H23 N3   | C17 H23 N3 |
| Sum formula            | C17 H23 N3   | C17 H23 N3 |
| Mr                     | 269.38       | 269.39     |
| Dx, g cm <sup>-3</sup> | 1.133        | 1.133      |
| Z                      | 16           | 16         |
| Mu (mm <sup>-1</sup> ) | 0.523        | 0.523      |
| F000                   | 2336.0       | 2336.0     |
| F000'                  | 2341.92      |            |
| h, k, lmax             | 12, 25, 37   | 12, 24, 37 |
| Nref                   | 6167         | 6098       |
| Tmin, Tmax             | 0.915, 0.944 |            |
| Tmin'                  | 0.915        |            |

Correction method= Not given

Data completeness= 0.989      Theta (max)= 71.540

R(reflections)= 0.0748 ( 19904)

wR2(reflections)=  
0.0941 ( 20281)

S = 0.872

Npar= 413

---

The following ALERTS were generated. Each ALERT has the format

**test-name\_ALERT\_alert-type\_alert-level.**

Click on the hyperlinks for more details of the test.

---

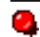

#### **Alert level A**

DIFMN02\_ALERT\_2\_A The minimum difference density is  $< -0.1 \times Z_{MAX} \times 2.00$   
\_refine\_diff\_density\_min given = -24.200  
Test value = -1.400

**Author Response: Although the residual density is out of border but there is no doubt about the chemical structure taking into account other evidences, e.g. NMR. The error maybe due to crystal imperfections.**

PLAT097\_ALERT\_2\_A Large Reported Max. (Positive) Residual Density 9.52 eA-3

**Author Response: Although the residual density is out of border but there is no doubt about the chemical structure taking into account other evidences, e.g. NMR. The error maybe due to crystal imperfections.**

PLAT098\_ALERT\_2\_A Large Reported Min. (Negative) Residual Density -24.20 eA-3

**Author Response: Although the residual density is out of border but there is no doubt about the chemical structure taking into account other evidences, e.g. NMR. The error maybe due to crystal imperfections.**

PLAT203\_ALERT\_2\_A Negative Isotropic ADP for H1 ..... -0.005 Report

**Author Response: Hydrogens give weak reflections. Crystal imperfections can not be excluded either.**

PLAT203\_ALERT\_2\_A Negative Isotropic ADP for H2 ..... -0.009 Report

**Author Response: Hydrogens give weak reflections. Crystal imperfections can not be excluded either.**

PLAT213\_ALERT\_2\_A Atom C11 has ADP max/min Ratio ..... 5.7 oblate

**Author Response: The structure is affected by some strain. Crystal imperfections can not be excluded either.**

PLAT703\_ALERT\_1\_A Torsion Calc -177.2(3), Rep -178.2(4), Dev.. 3.33 Sigma  
C(16-N(3)-C(17-C(19 1\_555 1\_555 1\_555 1\_555 # 5 Check

**Author Response: The structure is affected by some strain. Crystal imperfections can not be excluded either.**

PLAT703\_ALERT\_1\_A Torsion Calc -0.1(3), Rep 1.4(4), Dev.. 5.00 Sigma  
C(17-N(3)-C(16-C(12 1\_555 1\_555 1\_555 1\_555 # 6 Check

**Author Response: The structure is affected by some strain. Crystal imperfections can not be excluded either.**

PLAT703\_ALERT\_1\_A Torsion Calc -178.3(3), Rep -177.3(4), Dev.. 3.33 Sigma  
C(7)-N(5)-C(1)-C(11 1\_555 1\_555 1\_555 1\_555 # 10 Check

**Author Response: The structure is affected by some strain. Crystal imperfections can not be excluded either.**

PLAT703\_ALERT\_1\_A Torsion Calc 48.2(5), Rep 50.2(6), Dev.. 4.00 Sigma  
C(30-N(7)-C(31-C(40 1\_555 1\_555 1\_555 1\_555 # 15 Check

**Author Response: The structure is affected by some strain. Crystal imperfections can not be excluded either.**

PLAT703\_ALERT\_1\_A Torsion Calc 157.3(3), Rep 158.9(4), Dev.. 5.33 Sigma  
C(39-N(7)-C(31-C(40 1\_555 1\_555 1\_555 1\_555 # 20 Check

**Author Response: The structure is affected by some strain. Crystal imperfections can not be excluded either.**

PLAT703\_ALERT\_1\_A Torsion Calc -154.1(3), Rep -155.2(4), Dev.. 3.67 Sigma  
C(32-N(8)-C(28-C(2) 1\_555 1\_555 1\_555 1\_555 # 22 Check

**Author Response: The structure is affected by some strain. Crystal imperfections can not be excluded either.**

PLAT703\_ALERT\_1\_A Torsion Calc 0.4(3), Rep 2.1(4), Dev.. 5.67 Sigma  
C(17-C(10-C(12-C(16 1\_555 1\_555 1\_555 1\_555 # 57 Check

**Author Response: The structure is affected by some strain. Crystal imperfections can not be excluded either.**

PLAT703\_ALERT\_1\_A Torsion Calc -0.2(3), Rep -2.2(4), Dev.. 6.67 Sigma  
C(10-C(12-C(16-N(3) 1\_555 1\_555 1\_555 1\_555 # 59 Check

**Author Response: The structure is affected by some strain. Crystal imperfections can not be excluded either.**

PLAT703\_ALERT\_1\_A Torsion Calc -169.2(3), Rep -167.8(4), Dev.. 4.67 Sigma  
C(10-C(12-C(21-C(29 1\_555 1\_555 1\_555 1\_555 # 61 Check

**Author Response: The structre is affected by some strain. Crystal imperfections can not be excluded either.**

PLAT703\_ALERT\_1\_A Torsion Calc 179.4(2), Rep 178.4(3), Dev.. 5.00 Sigma  
C(21-C(12-C(16-N(3) 1\_555 1\_555 1\_555 1\_555 # 63 Check

**Author Response: The structre is affected by some strain. Crystal imperfections can not be excluded either.**

PLAT703\_ALERT\_1\_A Torsion Calc -168.4(2), Rep -167.3(3), Dev.. 5.50 Sigma  
N(3)-C(16-C(18-C(25 1\_555 1\_555 1\_555 1\_555 # 66 Check

**Author Response: The structre is affected by some strain. Crystal imperfections can not be excluded either.**

PLAT703\_ALERT\_1\_A Torsion Calc -176.4(2), Rep -177.4(3), Dev.. 5.00 Sigma  
C(10-C(17-C(19-C(13 1\_555 1\_555 1\_555 1\_555 # 71 Check

**Author Response: The structre is affected by some strain. Crystal imperfections can not be excluded either.**

PLAT703\_ALERT\_1\_A Torsion Calc -35.6(3), Rep -37.5(5), Dev.. 6.33 Sigma  
C(12-C(21-C(29-C(25 1\_555 1\_555 1\_555 1\_555 # 79 Check

**Author Response: The structre is affected by some strain. Crystal imperfections can not be excluded either.**

PLAT703\_ALERT\_1\_A Torsion Calc -90.0(4), Rep -91.3(5), Dev.. 3.25 Sigma  
C(27-C(26-C(30-C(38 1\_555 1\_555 1\_555 1\_555 # 90 Check

**Author Response: The structre is affected by some strain. Crystal imperfections can not be excluded either.**

PLAT703\_ALERT\_1\_A Torsion Calc 10.7(3), Rep 11.9(4), Dev.. 4.00 Sigma  
N(8)-C(28-C(33-C(35 1\_555 1\_555 1\_555 1\_555 # 92 Check

**Author Response: The structre is affected by some strain. Crystal imperfections can not be excluded either.**

PLAT703\_ALERT\_1\_A Torsion Calc 33.8(4), Rep 31.3(6), Dev.. 6.25 Sigma  
N(7)-C(30-C(38-C(40 1\_555 1\_555 1\_555 1\_555 # 94 Check

**Author Response: The structure is affected by some strain. Crystal imperfections can not be excluded either.**

PLAT703\_ALERT\_1\_A Torsion Calc -20.6(5), Rep -24.8(6), Dev.. 8.40 Sigma  
N(7)-C(31)-C(40)-C(38) 1\_555 1\_555 1\_555 1\_555 # 96 Check

**Author Response: The structure is affected by some strain. Crystal imperfections can not be excluded either.**

PLAT703\_ALERT\_1\_A Torsion Calc -35.5(3), Rep -34.3(5), Dev.. 4.00 Sigma  
N(8)-C(32)-C(35)-C(33) 1\_555 1\_555 1\_555 1\_555 # 97 Check

**Author Response: The structure is affected by some strain. Crystal imperfections can not be excluded either.**

PLAT703\_ALERT\_1\_A Torsion Calc 14.8(4), Rep 13.3(5), Dev.. 3.75 Sigma  
C(28)-C(33)-C(35)-C(32) 1\_555 1\_555 1\_555 1\_555 # 98 Check

**Author Response: The structure is affected by some strain. Crystal imperfections can not be excluded either.**

PLAT703\_ALERT\_1\_A Torsion Calc -7.9(4), Rep -3.5(6), Dev.. 11.00 Sigma  
C(30)-C(38)-C(40)-C(31) 1\_555 1\_555 1\_555 1\_555 # 100 Check

**Author Response: The structure is affected by some strain. Crystal imperfections can not be excluded either.**

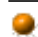

#### **Alert level B**

REFLT02\_ALERT\_1\_B The number of reflections greater than the sigma threshold  
cannot exceed the number of symmetry-independent reflections  
Number of symmetry-independent reflections = 6098  
Number of reflections greater than sigma threshold = 19904

PLAT213\_ALERT\_2\_B Atom N7 has ADP max/min Ratio ..... 4.9 prolat

**Author Response: The structure is affected by some strain. Crystal imperfections can not be excluded either.**

|                   |                         |     |       |   |           |
|-------------------|-------------------------|-----|-------|---|-----------|
| PLAT230_ALERT_2_B | Hirshfeld Test Diff for | N3  | --C16 | . | 10.0 s.u. |
| PLAT230_ALERT_2_B | Hirshfeld Test Diff for | N8  | --C32 | . | 12.6 s.u. |
| PLAT230_ALERT_2_B | Hirshfeld Test Diff for | N8  | --C36 | . | 33.0 s.u. |
| PLAT230_ALERT_2_B | Hirshfeld Test Diff for | C12 | --C16 | . | 8.3 s.u.  |
| PLAT230_ALERT_2_B | Hirshfeld Test Diff for | C13 | --C19 | . | 8.0 s.u.  |
| PLAT230_ALERT_2_B | Hirshfeld Test Diff for | C25 | --C29 | . | 7.5 s.u.  |
| PLAT230_ALERT_2_B | Hirshfeld Test Diff for | C28 | --C33 | . | 14.7 s.u. |
| PLAT230_ALERT_2_B | Hirshfeld Test Diff for | C32 | --C35 | . | 7.4 s.u.  |
| PLAT230_ALERT_2_B | Hirshfeld Test Diff for | C33 | --C35 | . | 11.0 s.u. |

|                   |                         |              |                |       |                 |
|-------------------|-------------------------|--------------|----------------|-------|-----------------|
| PLAT230_ALERT_2_B | Hirshfeld Test Diff for | N7           | --C30          | .     | 11.0 s.u.       |
| PLAT230_ALERT_2_B | Hirshfeld Test Diff for | N7           | --C31          | .     | 17.6 s.u.       |
| PLAT230_ALERT_2_B | Hirshfeld Test Diff for | N7           | --C39          | .     | 42.9 s.u.       |
| PLAT230_ALERT_2_B | Hirshfeld Test Diff for | C1           | --C11          | .     | 15.3 s.u.       |
| PLAT230_ALERT_2_B | Hirshfeld Test Diff for | C20          | --C23          | .     | 14.3 s.u.       |
| PLAT230_ALERT_2_B | Hirshfeld Test Diff for | C31          | --C40          | .     | 10.9 s.u.       |
| PLAT703_ALERT_1_B | Torsion Calc            | -2.4(4), Rep | -3.4(6), Dev.. |       | 2.50 Sigma      |
|                   | C(3)-N(1)-C(19)-C(17    | 1_555        | 1_555          | 1_555 | 1_555 # 2 Check |

**Author Response: The structre is affected by some strain. Crystal imperfections can not be excluded either.**

|                   |                       |               |                 |       |                  |
|-------------------|-----------------------|---------------|-----------------|-------|------------------|
| PLAT703_ALERT_1_B | Torsion Calc          | -36.9(3), Rep | -37.8(5), Dev.. |       | 3.00 Sigma       |
|                   | C(32)-N(8)-C(28)-C(33 | 1_555         | 1_555           | 1_555 | 1_555 # 23 Check |

**Author Response: The structre is affected by some strain. Crystal imperfections can not be excluded either.**

|                   |                      |                |                  |       |                  |
|-------------------|----------------------|----------------|------------------|-------|------------------|
| PLAT703_ALERT_1_B | Torsion Calc         | -179.1(3), Rep | -179.9(3), Dev.. |       | 2.67 Sigma       |
|                   | N(5)-C(1)-C(11)-N(6) | 1_555          | 1_555            | 1_555 | 1_555 # 27 Check |

**Author Response: The structre is affected by some strain. Crystal imperfections can not be excluded either.**

|                   |                      |              |                |       |                  |
|-------------------|----------------------|--------------|----------------|-------|------------------|
| PLAT703_ALERT_1_B | Torsion Calc         | -0.7(5), Rep | -2.2(6), Dev.. |       | 3.00 Sigma       |
|                   | N(5)-C(1)-C(11)-C(24 | 1_555        | 1_555          | 1_555 | 1_555 # 28 Check |

**Author Response: The structre is affected by some strain. Crystal imperfections can not be excluded either.**

|                   |                      |             |               |       |                  |
|-------------------|----------------------|-------------|---------------|-------|------------------|
| PLAT703_ALERT_1_B | Torsion Calc         | 0.8(3), Rep | 1.6(4), Dev.. |       | 2.67 Sigma       |
|                   | N(5)-C(1)-C(22)-C(20 | 1_555       | 1_555         | 1_555 | 1_555 # 29 Check |

**Author Response: The structre is affected by some strain. Crystal imperfections can not be excluded either.**

|                   |                       |               |                 |       |                  |
|-------------------|-----------------------|---------------|-----------------|-------|------------------|
| PLAT703_ALERT_1_B | Torsion Calc          | 177.6(3), Rep | 176.9(4), Dev.. |       | 2.33 Sigma       |
|                   | C(11)-C(1)-C(22)-C(20 | 1_555         | 1_555           | 1_555 | 1_555 # 31 Check |

**Author Response: The structre is affected by some strain. Crystal imperfections can not be excluded either.**

|                   |                       |              |                |       |                  |
|-------------------|-----------------------|--------------|----------------|-------|------------------|
| PLAT703_ALERT_1_B | Torsion Calc          | -3.1(5), Rep | -4.5(6), Dev.. |       | 2.80 Sigma       |
|                   | C(11)-C(1)-C(22)-C(26 | 1_555        | 1_555          | 1_555 | 1_555 # 32 Check |

**Author Response: The structure is affected by some strain. Crystal imperfections can not be excluded either.**

PLAT703\_ALERT\_1\_B Torsion Calc      -2.1(4), Rep      -3.0(5), Dev..      2.25 Sigma  
C(3)-C(2)-C(10)-C(17) 1\_555 1\_555 1\_555 1\_555 # 36 Check

**Author Response: The structure is affected by some strain. Crystal imperfections can not be excluded either.**

PLAT703\_ALERT\_1\_B Torsion Calc    -176.3(3), Rep    -177.1(4), Dev..      2.67 Sigma  
C(28)-C(2)-C(3)-N(1) 1\_555 1\_555 1\_555 1\_555 # 40 Check

**Author Response: The structure is affected by some strain. Crystal imperfections can not be excluded either.**

PLAT703\_ALERT\_1\_B Torsion Calc    -0.1(5), Rep      1.3(7), Dev..      2.80 Sigma  
C(28)-C(2)-C(10)-C(12) 1\_555 1\_555 1\_555 1\_555 # 43 Check

**Author Response: The structure is affected by some strain. Crystal imperfections can not be excluded either.**

PLAT703\_ALERT\_1\_B Torsion Calc    -0.5(3), Rep      -1.2(4), Dev..      2.33 Sigma  
C(12)-C(10)-C(17)-N(3) 1\_555 1\_555 1\_555 1\_555 # 55 Check

**Author Response: The structure is affected by some strain. Crystal imperfections can not be excluded either.**

PLAT703\_ALERT\_1\_B Torsion Calc    -0.7(4), Rep      0.2(4), Dev..      2.25 Sigma  
C(21)-C(12)-C(16)-C(18) 1\_555 1\_555 1\_555 1\_555 # 64 Check

**Author Response: The structure is affected by some strain. Crystal imperfections can not be excluded either.**

PLAT703\_ALERT\_1\_B Torsion Calc    11.7(4), Rep      10.8(6), Dev..      2.25 Sigma  
C(12)-C(16)-C(18)-C(25) 1\_555 1\_555 1\_555 1\_555 # 67 Check

**Author Response: The structure is affected by some strain. Crystal imperfections can not be excluded either.**

PLAT703\_ALERT\_1\_B Torsion Calc    179.7(3), Rep    -179.5(4), Dev..      2.67 Sigma  
N(3)-C(17)-C(19)-N(1) 1\_555 1\_555 1\_555 1\_555 # 68 Check

**Author Response: The structure is affected by some strain. Crystal imperfections can not be excluded either.**



PLAT703\_ALERT\_1\_B Torsion Calc 0.5(3), Rep -0.3(4), Dev.. 2.67 Sigma  
C(7)-C(20)-C(22)-C(1) 1\_555 1\_555 1\_555 1\_555 # 73 Check

**Author Response: The structure is affected by some strain. Crystal imperfections can not be excluded either.**

PLAT703\_ALERT\_1\_B Torsion Calc 168.0(3), Rep 167.3(4), Dev.. 2.33 Sigma  
C(22)-C(20)-C(23)-C(37) 1\_555 1\_555 1\_555 1\_555 # 76 Check

**Author Response: The structure is affected by some strain. Crystal imperfections can not be excluded either.**

PLAT703\_ALERT\_1\_B Torsion Calc 50.2(4), Rep 51.4(5), Dev.. 3.00 Sigma  
C(18)-C(25)-C(29)-C(21) 1\_555 1\_555 1\_555 1\_555 # 85 Check

**Author Response: The structure is affected by some strain. Crystal imperfections can not be excluded either.**

PLAT703\_ALERT\_1\_B Torsion Calc 89.7(4), Rep 88.6(5), Dev.. 2.75 Sigma  
C(22)-C(26)-C(30)-C(38) 1\_555 1\_555 1\_555 1\_555 # 88 Check

**Author Response: The structure is affected by some strain. Crystal imperfections can not be excluded either.**

PLAT703\_ALERT\_1\_B Torsion Calc 131.3(3), Rep 132.2(4), Dev.. 3.00 Sigma  
C(2)-C(28)-C(33)-C(35) 1\_555 1\_555 1\_555 1\_555 # 93 Check

**Author Response: The structure is affected by some strain. Crystal imperfections can not be excluded either.**

PLAT703\_ALERT\_1\_B Torsion Calc 152.9(4), Rep 151.8(5), Dev.. 2.75 Sigma  
C(26)-C(30)-C(38)-C(40) 1\_555 1\_555 1\_555 1\_555 # 95 Check

**Author Response: The structure is affected by some strain. Crystal imperfections can not be excluded either.**

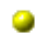

#### Alert level C

DIFMN03\_ALERT\_1\_C The minimum difference density is < -0.1\*ZMAX\*0.75  
The relevant atom site should be identified.  
DIFMX02\_ALERT\_1\_C The maximum difference density is > 0.1\*ZMAX\*0.75  
The relevant atom site should be identified.  
RINTA01\_ALERT\_3\_C The value of Rint is greater than 0.12  
Rint given 0.141

|                   |                                                  |       |         |
|-------------------|--------------------------------------------------|-------|---------|
| PLAT020_ALERT_3_C | The Value of Rint is Greater Than 0.12 .....     | 0.141 | Report  |
| PLAT166_ALERT_4_C | S.U's Given on Coordinates for Calc-flagged .... |       | H1 Note |
| PLAT166_ALERT_4_C | S.U's Given on Coordinates for Calc-flagged .... |       | H2 Note |
| PLAT213_ALERT_2_C | Atom C39 has ADP max/min Ratio .....             | 4.0   | prolat  |

**Author Response: The structure is affected by some strain. Crystal imperfections can not be excluded either.**

|                   |                                                |             |               |                     |       |         |         |
|-------------------|------------------------------------------------|-------------|---------------|---------------------|-------|---------|---------|
| PLAT220_ALERT_2_C | NonSolvent                                     | Resd 1      | C             | Ueq(max)/Ueq(min)   | Range | 3.6     | Ratio   |
| PLAT220_ALERT_2_C | NonSolvent                                     | Resd 2      | C             | Ueq(max)/Ueq(min)   | Range | 5.4     | Ratio   |
| PLAT220_ALERT_2_C | NonSolvent                                     | Resd 2      | N             | Ueq(max)/Ueq(min)   | Range | 3.1     | Ratio   |
| PLAT222_ALERT_3_C | NonSolvent                                     | Resd 2      | H             | Uiso(max)/Uiso(min) | Range | 4.4     | Ratio   |
| PLAT230_ALERT_2_C | Hirshfeld Test Diff for                        | N3          | --C17         | .                   |       | 6.3     | s.u.    |
| PLAT230_ALERT_2_C | Hirshfeld Test Diff for                        | C2          | --C3          | .                   |       | 5.7     | s.u.    |
| PLAT230_ALERT_2_C | Hirshfeld Test Diff for                        | C2          | --C10         | .                   |       | 5.3     | s.u.    |
| PLAT230_ALERT_2_C | Hirshfeld Test Diff for                        | N6          | --C11         | .                   |       | 7.0     | s.u.    |
| PLAT230_ALERT_2_C | Hirshfeld Test Diff for                        | N6          | --C27         | .                   |       | 6.2     | s.u.    |
| PLAT230_ALERT_2_C | Hirshfeld Test Diff for                        | C7          | --C14         | .                   |       | 5.2     | s.u.    |
| PLAT230_ALERT_2_C | Hirshfeld Test Diff for                        | C7          | --C20         | .                   |       | 5.3     | s.u.    |
| PLAT230_ALERT_2_C | Hirshfeld Test Diff for                        | C22         | --C26         | .                   |       | 5.2     | s.u.    |
| PLAT230_ALERT_2_C | Hirshfeld Test Diff for                        | C34         | --C37         | .                   |       | 5.6     | s.u.    |
| PLAT230_ALERT_2_C | Hirshfeld Test Diff for                        | C38         | --C40         | .                   |       | 5.1     | s.u.    |
| PLAT234_ALERT_4_C | Large Hirshfeld Difference                     | C26         | --C30         | .                   |       | 0.16    | Ang.    |
| PLAT241_ALERT_2_C | High 'MainMol' Ueq as Compared to Neighbors of |             |               |                     |       | C25     | Check   |
| PLAT241_ALERT_2_C | High 'MainMol' Ueq as Compared to Neighbors of |             |               |                     |       | C33     | Check   |
| PLAT241_ALERT_2_C | High 'MainMol' Ueq as Compared to Neighbors of |             |               |                     |       | C34     | Check   |
| PLAT241_ALERT_2_C | High 'MainMol' Ueq as Compared to Neighbors of |             |               |                     |       | C37     | Check   |
| PLAT241_ALERT_2_C | High 'MainMol' Ueq as Compared to Neighbors of |             |               |                     |       | C38     | Check   |
| PLAT241_ALERT_2_C | High 'MainMol' Ueq as Compared to Neighbors of |             |               |                     |       | C40     | Check   |
| PLAT242_ALERT_2_C | Low 'MainMol' Ueq as Compared to Neighbors of  |             |               |                     |       | C28     | Check   |
| PLAT242_ALERT_2_C | Low 'MainMol' Ueq as Compared to Neighbors of  |             |               |                     |       | C11     | Check   |
| PLAT242_ALERT_2_C | Low 'MainMol' Ueq as Compared to Neighbors of  |             |               |                     |       | C30     | Check   |
| PLAT242_ALERT_2_C | Low 'MainMol' Ueq as Compared to Neighbors of  |             |               |                     |       | C31     | Check   |
| PLAT340_ALERT_3_C | Low Bond Precision on C-C Bonds .....          |             |               |                     |       | 0.00488 | Ang.    |
| PLAT361_ALERT_2_C | Long C(sp3)-C(sp3) Bond                        | C30         | - C38         | .                   |       | 1.69    | Ang.    |
| PLAT703_ALERT_1_C | Torsion Calc                                   | 0.1(5), Rep | 1.1(6), Dev.. |                     |       | 2.00    | Sigma   |
|                   | C(19-N(1)-C(3)-C(2)                            | 1_555       | 1_555         | 1_555               | 1_555 | #       | 3 Check |

**Author Response: The structure is affected by some strain. Crystal imperfections can not be excluded either.**

|                   |                     |             |                |       |       |      |         |
|-------------------|---------------------|-------------|----------------|-------|-------|------|---------|
| PLAT703_ALERT_1_C | Torsion Calc        | 0.4(3), Rep | -0.1(3), Dev.. |       |       | 1.67 | Sigma   |
|                   | C(16-N(3)-C(17-C(10 | 1_555       | 1_555          | 1_555 | 1_555 | #    | 4 Check |

**Author Response: The structure is affected by some strain. Crystal imperfections can not be excluded either.**

|                   |                     |                |                  |       |       |      |         |
|-------------------|---------------------|----------------|------------------|-------|-------|------|---------|
| PLAT703_ALERT_1_C | Torsion Calc        | -178.2(3), Rep | -177.6(3), Dev.. |       |       | 2.00 | Sigma   |
|                   | C(1)-N(5)-C(7)-C(14 | 1_555          | 1_555            | 1_555 | 1_555 | #    | 8 Check |

**Author Response: The structure is affected by some strain. Crystal imperfections can not be excluded either.**

PLAT703\_ALERT\_1\_C Torsion Calc      -1.8(3), Rep      -2.3(4), Dev..      1.67 Sigma  
C(7)-N(5)-C(1)-C(22) 1\_555 1\_555 1\_555 1\_555 # 11 Check

**Author Response: The structure is affected by some strain. Crystal imperfections can not be excluded either.**

PLAT703\_ALERT\_1\_C Torsion Calc      178.8(3), Rep      179.4(3), Dev..      2.00 Sigma  
C(27-N(6)-C(11)-C(24) 1\_555 1\_555 1\_555 1\_555 # 14 Check

**Author Response: The structure is affected by some strain. Crystal imperfections can not be excluded either.**

PLAT703\_ALERT\_1\_C Torsion Calc      86.4(4), Rep      85.6(5), Dev..      2.00 Sigma  
C(39-N(7)-C(30)-C(26) 1\_555 1\_555 1\_555 1\_555 # 18 Check

**Author Response: The structure is affected by some strain. Crystal imperfections can not be excluded either.**

PLAT703\_ALERT\_1\_C Torsion Calc      -159.6(3), Rep      -160.1(4), Dev..      1.67 Sigma  
C(39-N(7)-C(30)-C(38) 1\_555 1\_555 1\_555 1\_555 # 19 Check

**Author Response: The structure is affected by some strain. Crystal imperfections can not be excluded either.**

PLAT703\_ALERT\_1\_C Torsion Calc      -153.9(3), Rep      -153.5(3), Dev..      1.33 Sigma  
C(36-N(8)-C(28)-C(33) 1\_555 1\_555 1\_555 1\_555 # 25 Check

**Author Response: The structure is affected by some strain. Crystal imperfections can not be excluded either.**

PLAT703\_ALERT\_1\_C Torsion Calc      5.0(5), Rep      6.0(6), Dev..      2.00 Sigma  
C(22-C(1)-C(11)-N(6) 1\_555 1\_555 1\_555 1\_555 # 33 Check

**Author Response: The structure is affected by some strain. Crystal imperfections can not be excluded either.**

PLAT703\_ALERT\_1\_C Torsion Calc      -176.6(3), Rep      -176.2(3), Dev..      1.33 Sigma  
C(22-C(1)-C(11)-C(24) 1\_555 1\_555 1\_555 1\_555 # 34 Check

**Author Response: The structure is affected by some strain. Crystal imperfections can not be excluded either.**

PLAT703\_ALERT\_1\_C Torsion Calc    -178.6(3), Rep    -178.0(4), Dev..        2.00 Sigma  
C(3)-C(2)-C(10-C(12) 1\_555 1\_555 1\_555 1\_555        #    35 Check

**Author Response: The structre is affected by some strain. Crystal imperfections  
can not be excluded either.**

PLAT703\_ALERT\_1\_C Torsion Calc    -163.7(3), Rep    -164.3(4), Dev..        2.00 Sigma  
C(10-C(2)-C(28-N(8) 1\_555 1\_555 1\_555 1\_555        #    41 Check

**Author Response: The structre is affected by some strain. Crystal imperfections  
can not be excluded either.**

PLAT703\_ALERT\_1\_C Torsion Calc        86.0(3), Rep        85.5(4), Dev..        1.67 Sigma  
C(10-C(2)-C(28-C(33) 1\_555 1\_555 1\_555 1\_555        #    42 Check

**Author Response: The structre is affected by some strain. Crystal imperfections  
can not be excluded either.**

PLAT703\_ALERT\_1\_C Torsion Calc       -1.7(3), Rep       -1.2(4), Dev..        1.67 Sigma  
N(5)-C(7)-C(20-C(22) 1\_555 1\_555 1\_555 1\_555        #    46 Check

**Author Response: The structre is affected by some strain. Crystal imperfections  
can not be excluded either.**

PLAT703\_ALERT\_1\_C Torsion Calc       -1.7(5), Rep       -2.3(6), Dev..        1.20 Sigma  
C(14-C(7)-C(20-C(23) 1\_555 1\_555 1\_555 1\_555        #    49 Check

**Author Response: The structre is affected by some strain. Crystal imperfections  
can not be excluded either.**

PLAT703\_ALERT\_1\_C Torsion Calc      -12.7(4), Rep      -12.1(6), Dev..        1.50 Sigma  
C(20-C(7)-C(14-C(34) 1\_555 1\_555 1\_555 1\_555        #    50 Check

**Author Response: The structre is affected by some strain. Crystal imperfections  
can not be excluded either.**

PLAT703\_ALERT\_1\_C Torsion Calc       -2.4(5), Rep       -3.2(7), Dev..        1.60 Sigma  
C(2)-C(10-C(12-C(21) 1\_555 1\_555 1\_555 1\_555        #    52 Check

**Author Response: The structre is affected by some strain. Crystal imperfections  
can not be excluded either.**

PLAT703\_ALERT\_1\_C Torsion Calc    -177.9(2), Rep    -177.6(3), Dev..        1.50 Sigma  
C(2)-C(10-C(17-N(3) 1\_555 1\_555 1\_555 1\_555        #    53 Check

**Author Response: The structure is affected by some strain. Crystal imperfections can not be excluded either.**

PLAT703\_ALERT\_1\_C Torsion Calc -0.1(4), Rep 0.7(6), Dev.. 2.00 Sigma  
C(2)-C(10)-C(17)-C(19) 1\_555 1\_555 1\_555 1\_555 # 54 Check

**Author Response: The structure is affected by some strain. Crystal imperfections can not be excluded either.**

PLAT703\_ALERT\_1\_C Torsion Calc -179.0(2), Rep -178.6(4), Dev.. 2.00 Sigma  
C(17)-C(10)-C(12)-C(21) 1\_555 1\_555 1\_555 1\_555 # 58 Check

**Author Response: The structure is affected by some strain. Crystal imperfections can not be excluded either.**

PLAT703\_ALERT\_1\_C Torsion Calc 41.6(4), Rep 41.1(5), Dev.. 1.25 Sigma  
C(7)-C(14)-C(34)-C(37) 1\_555 1\_555 1\_555 1\_555 # 65 Check

**Author Response: The structure is affected by some strain. Crystal imperfections can not be excluded either.**

PLAT703\_ALERT\_1\_C Torsion Calc -35.4(4), Rep -34.9(5), Dev.. 1.25 Sigma  
C(16)-C(18)-C(25)-C(29) 1\_555 1\_555 1\_555 1\_555 # 72 Check

**Author Response: The structure is affected by some strain. Crystal imperfections can not be excluded either.**

PLAT703\_ALERT\_1\_C Torsion Calc 179.8(3), Rep -179.8(3), Dev.. 1.33 Sigma  
C(1)-C(22)-C(26)-C(30) 1\_555 1\_555 1\_555 1\_555 # 81 Check

**Author Response: The structure is affected by some strain. Crystal imperfections can not be excluded either.**

PLAT703\_ALERT\_1\_C Torsion Calc -177.6(4), Rep -177.1(4), Dev.. 1.25 Sigma  
C(30)-C(26)-C(27)-N(6) 1\_555 1\_555 1\_555 1\_555 # 91 Check

**Author Response: The structure is affected by some strain. Crystal imperfections can not be excluded either.**

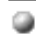

#### **Alert level G**

|                                                                   |             |
|-------------------------------------------------------------------|-------------|
| PLAT005_ALERT_5_G No Embedded Refinement Details Found in the CIF | Please Do ! |
| PLAT007_ALERT_5_G Number of Unrefined Donor-H Atoms .....         | 1 Report    |
| H3                                                                |             |
| PLAT199_ALERT_1_G Reported _cell_measurement_temperature .....    | 293 Check   |
| (K)                                                               |             |

|                   |                                                  |                                   |               |     |              |
|-------------------|--------------------------------------------------|-----------------------------------|---------------|-----|--------------|
| PLAT200_ALERT_1_G | Reported                                         | _diffrn_ambient_temperature ..... | (K)           | 293 | Check        |
| PLAT793_ALERT_4_G | Model has Chirality at C28                       |                                   | (Centro SpGr) |     | R Verify     |
| PLAT793_ALERT_4_G | Model has Chirality at C30                       |                                   | (Centro SpGr) |     | R Verify     |
| PLAT808_ALERT_5_G | No Parseable SHELXL Style Weighting Scheme Found |                                   |               |     | Please Check |
| PLAT882_ALERT_1_G | No Datum for _diffrn_reflms_av_unetI/netI .....  |                                   |               |     | Please Do !  |
| PLAT883_ALERT_1_G | Absent Datum for _atom_sites_solution_primary .. |                                   |               |     | Please Do !  |

---

26 **ALERT level A** = Most likely a serious problem - resolve or explain  
 37 **ALERT level B** = A potentially serious problem, consider carefully  
 58 **ALERT level C** = Check. Ensure it is not caused by an omission or oversight  
 9 **ALERT level G** = General information/check it is not something unexpected

71 ALERT type 1 CIF construction/syntax error, inconsistent or missing data  
 47 ALERT type 2 Indicator that the structure model may be wrong or deficient  
 4 ALERT type 3 Indicator that the structure quality may be low  
 5 ALERT type 4 Improvement, methodology, query or suggestion  
 3 ALERT type 5 Informative message, check

---

It is advisable to attempt to resolve as many as possible of the alerts in all categories. Often the minor alerts point to easily fixed oversights, errors and omissions in your CIF or refinement strategy, so attention to these fine details can be worthwhile. In order to resolve some of the more serious problems it may be necessary to carry out additional measurements or structure refinements. However, the purpose of your study may justify the reported deviations and the more serious of these should normally be commented upon in the discussion or experimental section of a paper or in the "special\_details" fields of the CIF. checkCIF was carefully designed to identify outliers and unusual parameters, but every test has its limitations and alerts that are not important in a particular case may appear. Conversely, the absence of alerts does not guarantee there are no aspects of the results needing attention. It is up to the individual to critically assess their own results and, if necessary, seek expert advice.

### Publication of your CIF in IUCr journals

A basic structural check has been run on your CIF. These basic checks will be run on all CIFs submitted for publication in IUCr journals (*Acta Crystallographica*, *Journal of Applied Crystallography*, *Journal of Synchrotron Radiation*); however, if you intend to submit to *Acta Crystallographica Section C* or *E* or *IUCrData*, you should make sure that full publication checks are run on the final version of your CIF prior to submission.

### Publication of your CIF in other journals

Please refer to the *Notes for Authors* of the relevant journal for any special instructions relating to CIF submission.

### Validation response form

Please find below a validation response form (VRF) that can be filled in and pasted into your CIF.

```

# start Validation Reply Form
_vrf_REFLT02__142469_3
;
PROBLEM: The number of reflections greater than the sigma threshold
RESPONSE: ...
;
_vrf_DIFMN03__142469_3
;
PROBLEM: The minimum difference density is < -0.1*ZMAX*0.75
RESPONSE: ...
;
_vrf_DIFMX02__142469_3
;
PROBLEM: The maximum difference density is > 0.1*ZMAX*0.75
RESPONSE: ...
;
_vrf_RINTA01__142469_3
;
PROBLEM: The value of Rint is greater than 0.12
RESPONSE: ...
;
_vrf_PLAT230__142469_3
;
PROBLEM: Hirshfeld Test Diff for      N3      --C16      .      10.0 s.u.
RESPONSE: ...
;
_vrf_PLAT020__142469_3
;
PROBLEM: The Value of Rint is Greater Than 0.12 .....      0.141 Report
RESPONSE: ...
;
_vrf_PLAT166__142469_3
;
PROBLEM: S.U's Given on Coordinates for Calc-flagged ....      H1 Note
RESPONSE: ...
;
_vrf_PLAT220__142469_3
;
PROBLEM: NonSolvent   Resd 1   C   Ueq(max)/Ueq(min) Range      3.6 Ratio
RESPONSE: ...
;
_vrf_PLAT222__142469_3
;
PROBLEM: NonSolvent Resd 2   H   Uiso(max)/Uiso(min) Range      4.4 Ratio
RESPONSE: ...
;
_vrf_PLAT234__142469_3
;
PROBLEM: Large Hirshfeld Difference C26      --C30      .      0.16 Ang.
RESPONSE: ...
;
_vrf_PLAT241__142469_3
;
PROBLEM: High   'MainMol' Ueq as Compared to Neighbors of      C25 Check
RESPONSE: ...
;
_vrf_PLAT242__142469_3

```

```

;
PROBLEM: Low      'MainMol' Ueq as Compared to Neighbors of      C28 Check
RESPONSE: ...
;
_vrf_PLAT340__142469_3
;
PROBLEM: Low Bond Precision on  C-C Bonds .....      0.00488 Ang.
RESPONSE: ...
;
_vrf_PLAT361__142469_3
;
PROBLEM: Long      C(sp3)-C(sp3) Bond  C30      - C38      .      1.69 Ang.
RESPONSE: ...
;
# end Validation Reply Form

```

**PLATON version of 11/11/2024; check.def file version of 11/11/2024**

Datablock \_142469\_3 - ellipsoid plot

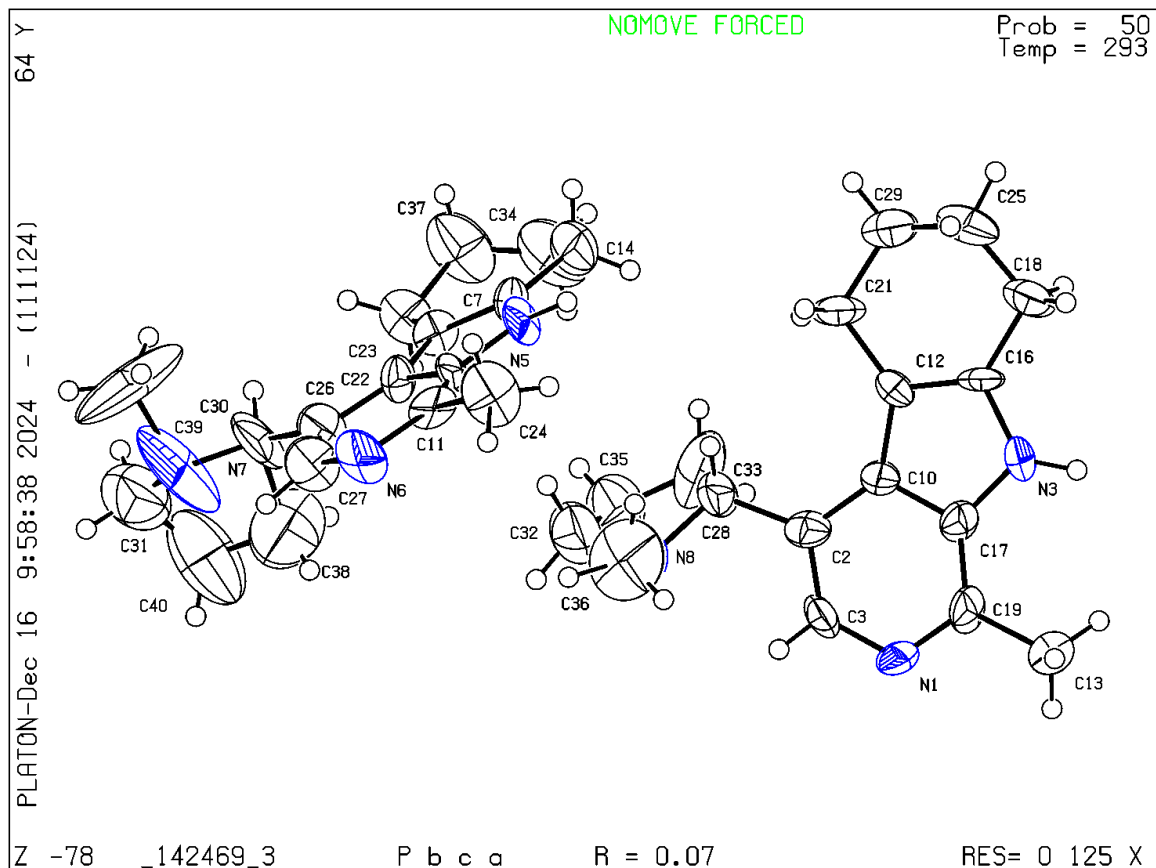

Supplement: Additional file 3 [file 1860-5397-21-79-S3.pdf]
